# Supplementary material for: Facile Synthesis of Sponge-Like Porous Nano Carbon-Coated Silicon Anode with Tunable Pore Structure for High-Stability Lithium-Ion Batteries
Source: MDPI journal article supplement (doi:10.3390/molecules26113211), 2021-05-27
Supplement: s1 [file s1]

## Supporting Information

# Facile Synthesis of Sponge-Like Porous Nano Carbon-Coated Silicon Anode with Tunable Pore Structure for High-Stability Lithium-Ion Batteries

Shugui Song <sup>1</sup>, Jingcang Li <sup>1</sup>, Anqi Zheng <sup>1</sup>, Yongqiang Yang <sup>2,\*</sup> and Kuibo Yin <sup>1,\*</sup>

<sup>1</sup> SEU-FEI Nano-Pico Center, Key Laboratory of MEMS of Ministry of Education, Southeast University, Nanjing 210096, China; songshugui@seu.edu.cn

<sup>2</sup> National Graphene Products Quality Supervision and Inspection Center (Jiangsu), Jiangsu Province Special Equipment Safety Supervision Inspection Institute, Wuxi 214174, China

\* Correspondence: yqyang@wxtjy.com (Y.Y.); yinkuibo@seu.edu.cn (K.Y.)

**Keywords:** carbon-coated silicon, porous structure, mechanical simulation, lithium-ion battery

## Figures and tables

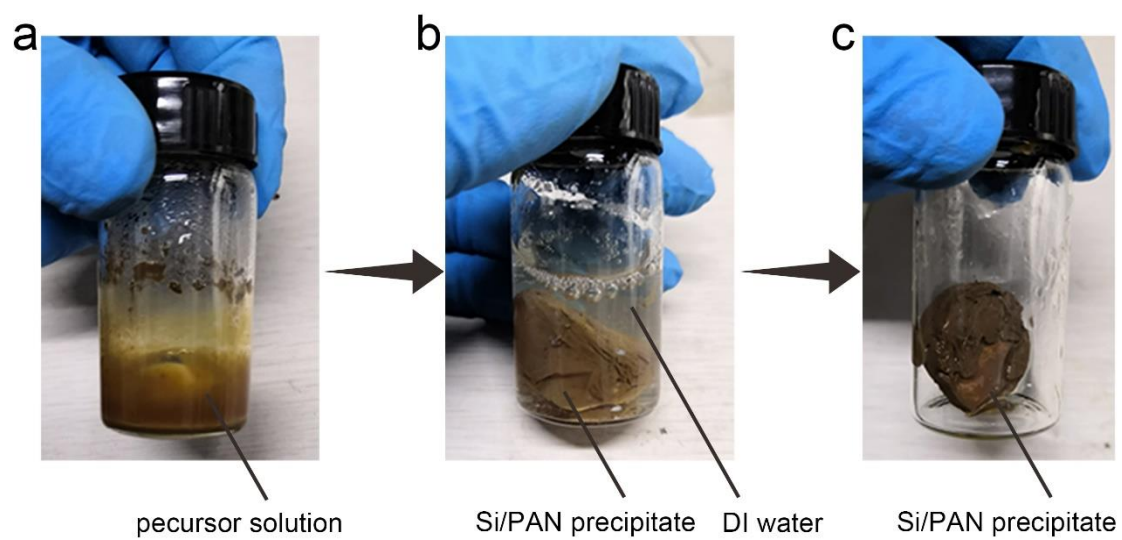

Figure S1. Schematic of the precipitation process. The precursor solution (a) before and (b) after adding DI water. (c) Silicon/polyacrylonitrile (Si/PAN) precipitate.

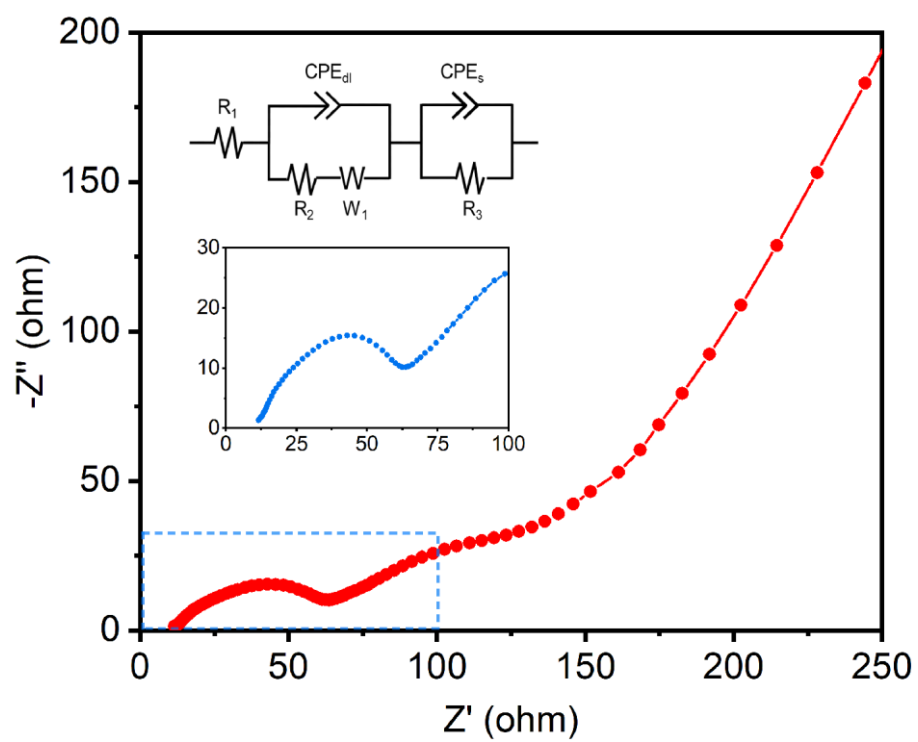

Figure S2. Electrochemical impedance spectroscopy (EIS) of sCCSi.

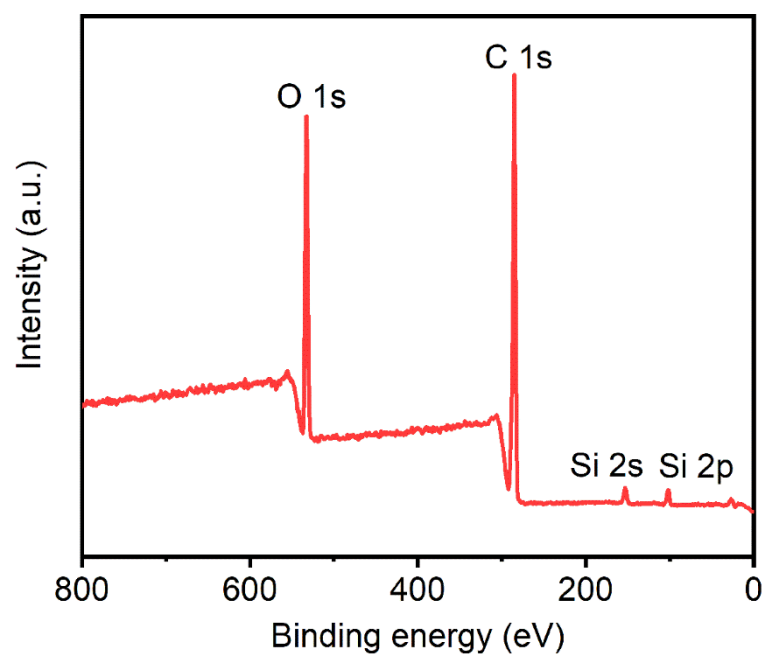

Figure S3. X-ray photoelectron spectroscopy (XPS) full spectra of sCCSi.

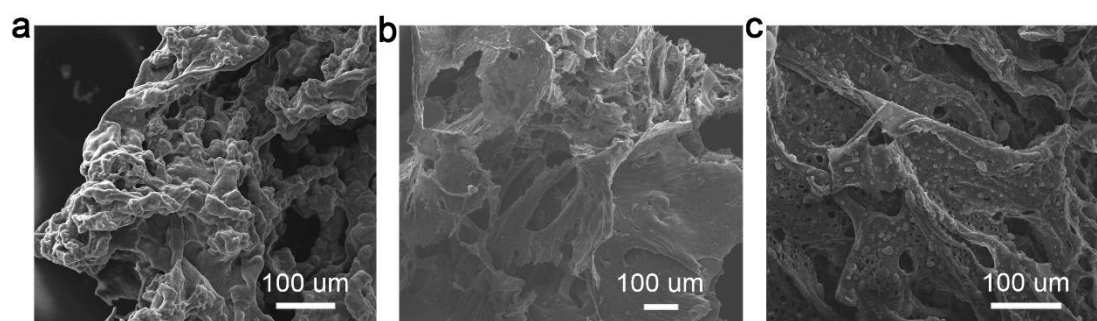

Figure S4. SEM images of (a) CCSi-HT-U, (b) CCSi-HT-M, and (c) CCSi-RT-U.

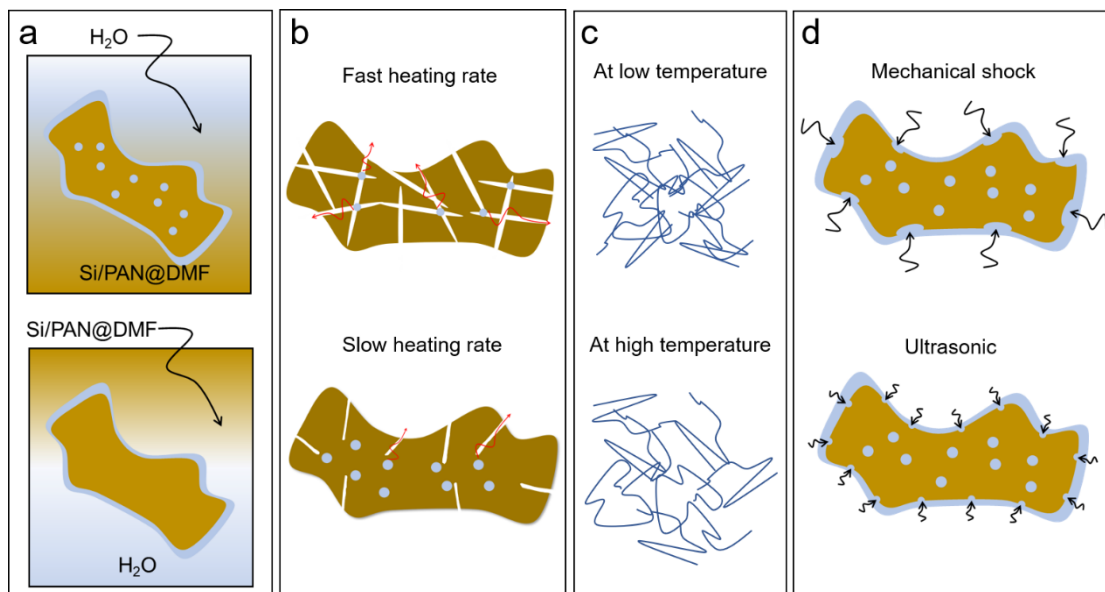

Figure S5. Schematics of the possible mechanisms of (a) water adding strategy, (b) heating rate, (c) stirring temperature, and (d) oscillation method.

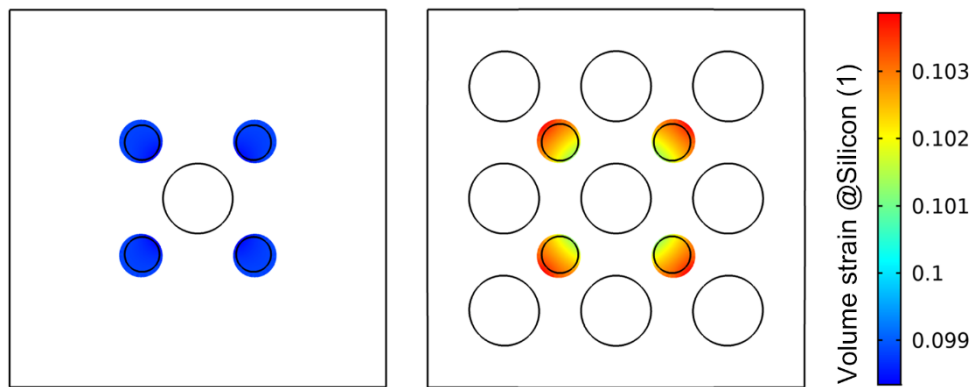

Figure S6. The distribution of volume strain in silicon nanoparticles in CCSi and sCCSi models.

Table S1. Comparison of the synthesis method of sCCSi with other methods for the synthesis of silicon-based anodes.

| <b>Material</b>        | <b>Involving in etching process</b> | <b>Number of preparation steps</b> | <b>Cost</b> | <b>Ref</b> |
|------------------------|-------------------------------------|------------------------------------|-------------|------------|
| Si/SiO <sub>x</sub> /C | Yes                                 | 5                                  | Medium      | (1)        |
| Si/C@C                 | No                                  | 5                                  | Medium      | (2)        |
| Si-C-G-15              | No                                  | 3                                  | Low         | (3)        |
| Si/C-ZIF-8/CNFs        | No                                  | 7                                  | High        | (4)        |
| Si/C                   | Yes                                 | 5                                  | High        | (5)        |
| EPSi-mag               | Yes                                 | 7                                  | High        | (6)        |
| Si/FLG/C               | No                                  | 4                                  | High        | (7)        |
| Si@C@ZIF-67-800N       | Yes                                 | 9                                  | High        | (8)        |
| B-Si/CNT@G             | Yes                                 | 5                                  | High        | (9)        |
| Si@NC NPs              | No                                  | 3                                  | Medium      | (10)       |
| sCCSi                  | No                                  | 4                                  | Low         | This work  |

Note: The ‘Number of preparation steps’ and ‘Cost’ of the synthesis methods are estimated based on the work in the corresponding article. The ‘Number of preparation steps’ is estimated based on important steps such as whether there is a material transfer process and whether heat treatment is performed. The ‘Cost’ is estimated based on the cost of materials, reagents, and equipment used.



Table S2. Typical pore diameter distribution of sCCSi.

|                       | <b>Number of</b> | <b>Mean</b> | <b>Standard</b>       | <b>Minimum</b> | <b>Median</b> | <b>Maximum</b> |
|-----------------------|------------------|-------------|-----------------------|----------------|---------------|----------------|
|                       | <b>samples</b>   | <b>(nm)</b> | <b>deviation (nm)</b> | <b>(nm)</b>    | <b>(nm)</b>   | <b>(nm)</b>    |
| Porous<br>structure 1 | 100              | 191         | 75                    | 67             | 183           | 434            |
| Porous<br>structure 2 | 100              | 2409        | 929                   | 471            | 2252          | 5818           |
| Porous<br>structure 3 | 100              | 8342        | 1924                  | 4186           | 8136          | 13889          |

Table S3. Comparison of the cycle performance of carbon/silicon composites as anode for lithium-ion batteries.

| Material               | Silicon content | Capacity (mAh g <sup>-1</sup> ) | Capacity retention @cycles | Current density (mA g <sup>-1</sup> ) | Ref       |
|------------------------|-----------------|---------------------------------|----------------------------|---------------------------------------|-----------|
| Si/SiO <sub>x</sub> /C | 10%             | 780                             | 65% @100                   | 400* (0.5 C)                          | (1)       |
| Si/C@C                 | 27.4%           | 602                             | 80% @100                   | 1000                                  | (2)       |
| Si-C-G-15              | 15%             | 712                             | 80% @100                   | 130                                   | (3)       |
| Si/C-ZIF-8/CNFs        | 54.5%           | 945.5                           | 64% @150                   | 200                                   | (4)       |
| Si/C                   | 21.8%           | 997                             | 71% @150                   | 200                                   | (5)       |
| EPSi-mag               | 50%             | 1000                            | 78% @150                   | 300*                                  | (6)       |
| Si/FLG/C               | 51.9%           | 757                             | 62% @300                   | 400* (0.5 C)                          | (7)       |
| Si@C@ZIF-67-800N       | 7.6%*           | 852                             | 74%* @300                  | 1000                                  | (8)       |
| B-Si/CNT@G             | 26.7%*          | 180 <sup>#</sup>                | 82.5% @300                 | 180                                   | (9)       |
| Si@NC NPs              | 11.8%           | 967.1                           | 87.3% @300                 | 800* (1 C)                            | (10)      |
| sCCSi-15               | 16.7%           | 726.7                           | 70.6% @300                 | 500                                   | This work |
| sCCSi-12               | 33.3%           | 1173.1                          | 70.2% @300                 | 500                                   | This work |

Notes: (1) Data with '\*' are estimated values. (2) Data with '#' are from full cell LIBs.

Table S4. Samples' names and corresponding synthesis methods.

| Method 1                           | Method 2         | Name      |
|------------------------------------|------------------|-----------|
| Add precursor solution to DI water | /                | sCCSi-w   |
| Vacuum drying                      | /                | CCSi-v    |
| Oven drying                        | /                | CCSi-o    |
| High temperature (80 °C)           | Ultrasonic shake | CCSi-HT-U |
| High temperature (80 °C)           | Mechanical shake | CCSi-HT-M |
| Room temperature (25 °C)           | Ultrasonic shake | CCSi-RT-U |

Table S5. The model parameters and material parameters in mechanical simulation.

| Parameter          | Value             | Unit               | Definition                               |
|--------------------|-------------------|--------------------|------------------------------------------|
| $l$                | 270               | nm                 | Length of sCCSi model                    |
| $R_{silicon}$      | 25                | nm                 | Silicon diameter in sCCSi model          |
| $R_{pore}$         | 50                | nm                 | Pore diameter in sCCSi model             |
| $T_{ref}$          | 293.15            | K                  | Reference temperature                    |
| $T$                | 1000              | K                  | Thermal expansion temperature            |
| $\alpha_{carbon}$  | $1 \cdot 10^{-7}$ | K <sup>-1</sup>    | Thermal expansion coefficient of carbon  |
| $\rho_{carbon}$    | 1.7               | g cm <sup>-3</sup> | Density of carbon                        |
| $E_{carbon}$       | 200               | GPa                | Young's modulus of carbon                |
| $\nu_{carbon}$     | 0.3               | 1                  | Poisson's ratio of carbon                |
| $\alpha_{silicon}$ | $9 \cdot 10^{-5}$ | K <sup>-1</sup>    | Thermal expansion coefficient of silicon |
| $\rho_{silicon}$   | 2.33              | g cm <sup>-3</sup> | Density of silicon                       |
| $E_{silicon}$      | 140               | GPa                | Young's modulus of silicon               |
| $\nu_{silicon}$    | 0.265             | 1                  | Poisson's ratio of silicon               |

## REFERENCES

1. C.-C. Hsieh, Y.-G. Lin, C.-L. Chiang, W.-R. Liu, Carbon-coated porous Si/C composite anode materials via two-step etching/coating processes for lithium-ion batteries. *Ceram. Int.* **46**, 26598-26607 (2020).
2. Y. Li *et al.*, Sandwich structure of carbon-coated silicon/carbon nanofiber anodes for lithium-ion batteries. *Ceram. Int.* **45**, 16195-16201 (2019).
3. S. Y. Kim *et al.*, Facile Synthesis of Carbon-Coated Silicon/Graphite Spherical Composites for High-Performance Lithium-Ion Batteries. *ACS Appl. Mater. Interfaces* **8**, 12109-12117 (2016).
4. Y. Zeng *et al.*, N-doped porous carbon nanofibers sheathed pumpkin-like Si/C composites as free-standing anodes for lithium-ion batteries. *Journal of Energy Chemistry* **54**, 727-735 (2021).
5. H. Zhang *et al.*, Electrospun core-shell silicon/carbon fibers with an internal honeycomb-like conductive carbon framework as an anode for lithium ion batteries. *Journal of Materials Chemistry A* **3**, 7112-7120 (2015).
6. X. Li *et al.*, A stable nanoporous silicon anode prepared by modified magnesiothermic reactions. *Nano Energy* **20**, 68-75 (2016).
7. C.-C. Hsieh, W.-R. Liu, Carbon-coated Si particles binding with few-layered graphene via a liquid exfoliation process as potential anode materials for lithium-ion batteries. *Surf. Coat. Technol.* **387**, 125553 (2020).
8. N. Liu *et al.*, Multi-core yolk-shell like mesoporous double carbon-coated silicon nanoparticles as anode materials for lithium-ion batteries. *Energy Storage Mater.* **18**, 165-173 (2019).
9. P. Li, J.-Y. Hwang, Y.-K. Sun, Nano/Microstructured Silicon-Graphite Composite Anode for High-Energy-Density Li-Ion Battery. *ACS Nano* **13**, 2624-2633 (2019).
10. H. S. Choi *et al.*, Enhanced cycle stability of silicon nanoparticles coated with nitrogen-doped carbon layer for lithium-ion battery anode. *Current Applied Physics* **17**, 1087-1093 (2017).
